# Supplementary material for: A (RP)UHPLC/UV analytical method to quantify dsRNA during the mRNA vaccine manufacturing process
Source: Royal Society of Chemistry journal article supplement (doi:10.1039/d4ay00560k), 2024-01-01
Supplement: d4ay00560k1.pdf [file d4ay00560k1.pdf]

## Supplementary Material

### (RP)UHPLC/UV analytical method to quantify dsRNA during mRNA vaccine manufacturing process

Sara Sousa Rosa <sup>a,b,c</sup> #, Shuran Zhang <sup>a</sup> #, Yustika Sari <sup>a</sup> , Marco PC Marques <sup>a</sup> \*

<sup>a</sup> Department of Biochemical Engineering, University College London, Gordon Street, London, WC1E 6BT, United Kingdom

<sup>b</sup> Department of Bioengineering, iBB—Institute for Bioengineering and Biosciences, Instituto Superior Técnico, Universidade de Lisboa, Lisboa, Portugal

<sup>c</sup> Associate Laboratory i4HB—Institute for Health and Bioeconomy, Instituto Superior Técnico, Universidade de Lisboa, Lisboa, Portugal

# These authors contributed equally to this work

\*Correspondence:

**Dr. Marco P.C. Marques**

University College London, Biochemical Engineering, Bernard Katz Building, Gower Street, London, WC1E 6BT, United Kingdom

e-mail: marco.marques@ucl.ac.uk

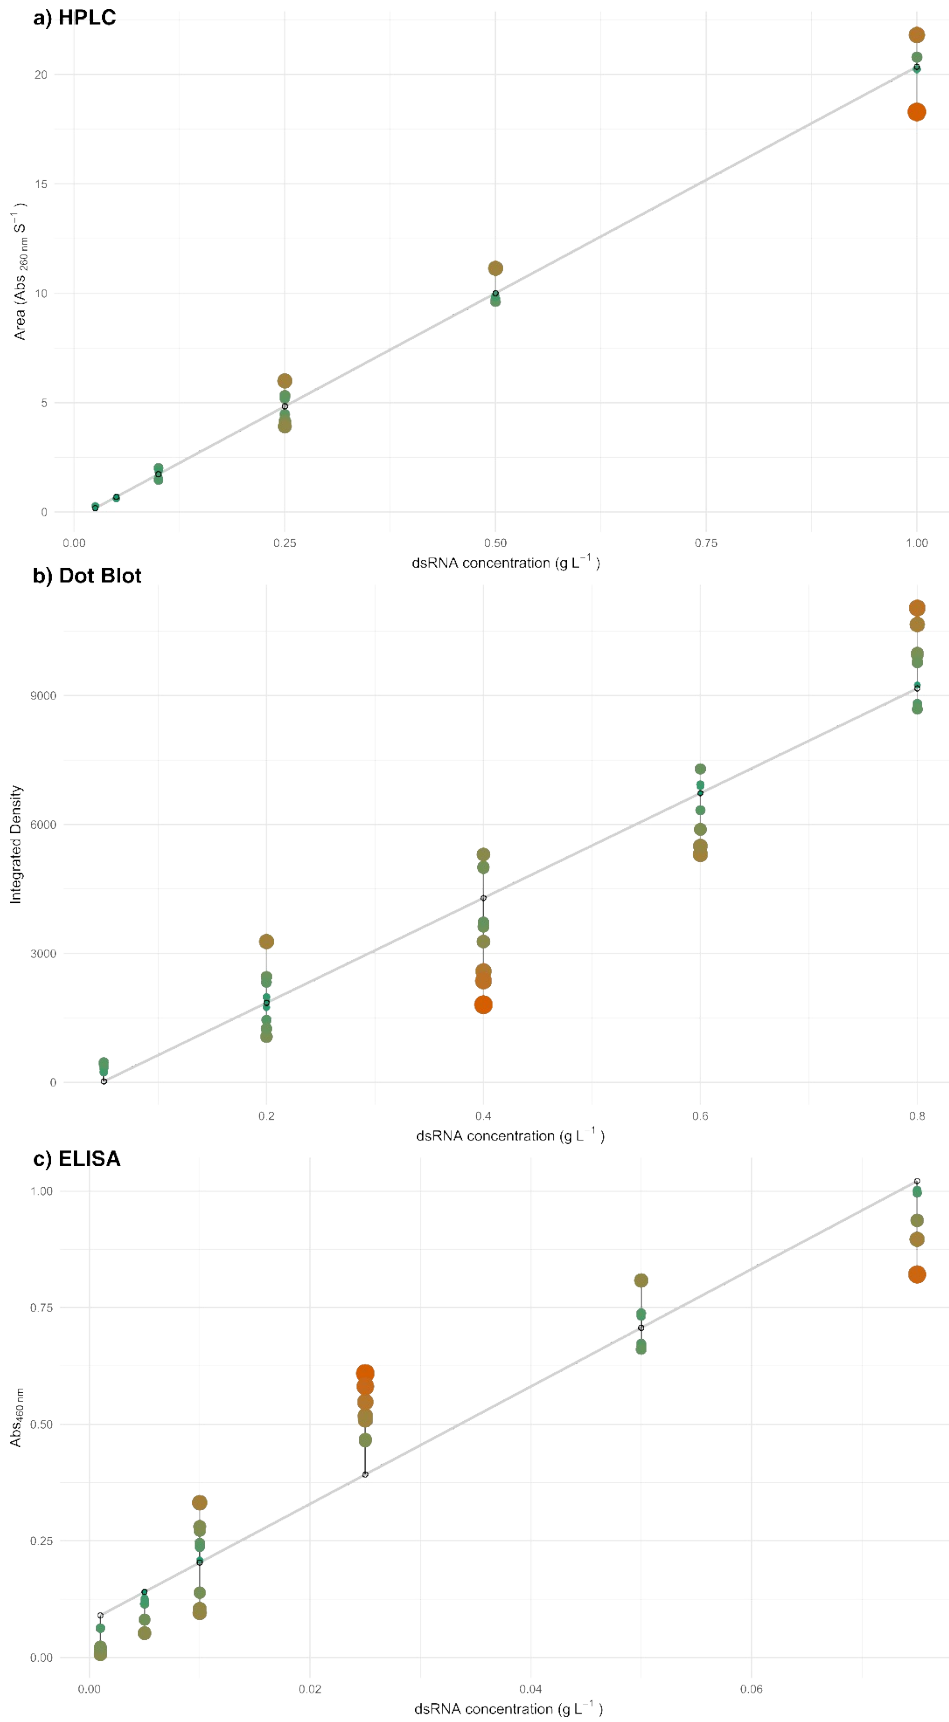

**Supplementary Figure S1.** Residual plots for the calibration curves used to calculate dsRNA concentration using the HPLC (a), the Dot Blot (b) and ELISA (c).

**a) HPLC low\_RNA**

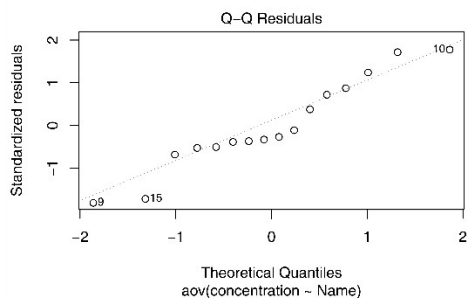

**b) HPLC high\_RNA**

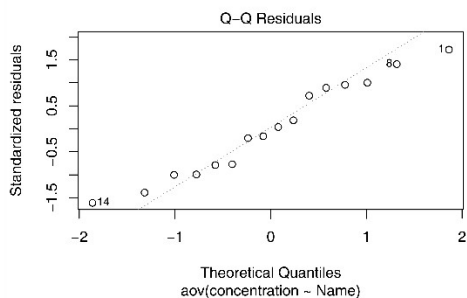

**c) Dot Blot low\_RNA**

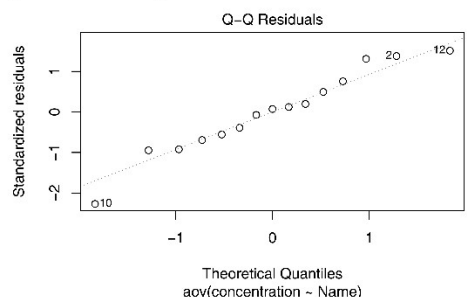

**d) Dot Blot high\_RNA**

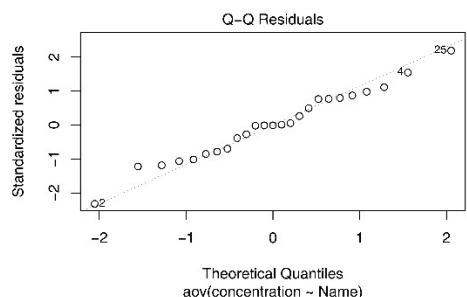

**Supplementary Figure S2.** Residual plots for the dsRNA spiking studies. Dot Blot results using 0.1 g L<sup>-1</sup> (a) and 0.4 g L<sup>-1</sup> dsRNA (b). HPLC results using 0.1 g L<sup>-1</sup> (c) and 0.4 g L<sup>-1</sup> of dsRNA (d).

**Supplementary Table S1.** Dot Blot Tukey test results for high dsRNA concentration (0.4 g.L<sup>-1</sup>). Concentration used for DNA correspond to 10 and 90 nM and to NTPs to 2 and 7.6 mM, for low and high, respectively.

| Factor 1        | Factor 2 | Mean difference | Confidence Interval at 95% |             | Adjusted P value |
|-----------------|----------|-----------------|----------------------------|-------------|------------------|
|                 |          |                 | Lower bound                | Upper bound |                  |
| <b>DNA_high</b> | DNA_low  | 0.169           | -0.063                     | 0.400       | 0.228            |
|                 | NTP_high | 0.319           | 0.108                      | 0.531       | 0.002            |
|                 | NTP_low  | 0.042           | -0.170                     | 0.253       | 0.975            |
|                 | RNA_high | 0.008           | -0.212                     | 0.228       | 1.000            |
| <b>DNA_low</b>  | NTP_low  | 0.151           | -0.061                     | 0.362       | 0.246            |
|                 | DNA_low  | -0.127          | -0.338                     | 0.085       | 0.404            |
|                 | RNA_high | -0.161          | -0.381                     | 0.059       | 0.223            |
| <b>NTP_low</b>  | NTP_high | -0.277          | -0.467                     | -0.088      | 0.002            |
| <b>RNA_high</b> | NTP_high | -0.312          | -0.510                     | -0.113      | 0.001            |
|                 | NTP_low  | -0.034          | -0.233                     | 0.164       | 0.985            |

**Supplementary Table S2.** Dot BlotTukey test results for low dsRNA concentration. (0.1 g.L<sup>-1</sup>). Concentration used for DNA correspond to 10 and 90 nM and to NTPs to 2 and 7.6 mM, for low and high, respectively.

| Factor 1        | Factor 2 | Confidence Interval at 95% |             |             | Adjusted P value |
|-----------------|----------|----------------------------|-------------|-------------|------------------|
|                 |          | Mean Difference            | Lower bound | Upper bound |                  |
| <b>DNA_high</b> | DNA_low  | -0.004                     | -0.052      | 0.044       | 0.998            |
|                 | NTP_high | -0.013                     | -0.058      | 0.032       | 0.864            |
|                 | NTP_low  | -0.022                     | -0.076      | 0.031       | 0.663            |
|                 | RNA_low  | -0.034                     | -0.082      | 0.014       | 0.213            |
| <b>DNA_low</b>  | NTP_low  | -0.009                     | -0.054      | 0.036       | 0.965            |
|                 | DNA_low  | -0.018                     | -0.071      | 0.036       | 0.808            |
|                 | RNA_low  | -0.03                      | -0.078      | 0.018       | 0.322            |
| <b>NTP_low</b>  | NTP_high | -0.009                     | -0.060      | 0.042       | 0.974            |
| <b>RNA_low</b>  | NTP_high | -0.021                     | -0.066      | 0.024       | 0.571            |
|                 | NTP_low  | -0.012                     | -0.065      | 0.042       | 0.947            |

**Supplementary Table S3.** HPLC Tukey test results for high dsRNA concentration (0.4 g.L<sup>-1</sup>). Concentration used for DNA correspond to 10 and 90 nM and to NTPs to 2 and 7.6 mM, for low and high, respectively.

| Factor 1        | Factor 2 | Confidence Interval at 95% |             |             | Adjusted P value |
|-----------------|----------|----------------------------|-------------|-------------|------------------|
|                 |          | Mean Difference            | Lower bound | Upper bound |                  |
| <b>DNA_high</b> | DNA_low  | -0.014                     | -0.139      | 0.111       | 0.996            |
|                 | NTP_high | -0.041                     | -0.157      | 0.075       | 0.775            |
|                 | NTP_low  | 0.02                       | -0.105      | 0.145       | 0.984            |
|                 | RNA_high | 0.014                      | -0.129      | 0.156       | 0.998            |
| <b>DNA_low</b>  | NTP_low  | -0.028                     | -0.153      | 0.098       | 0.950            |
|                 | DNA_low  | 0.034                      | -0.100      | 0.168       | 0.919            |
|                 | RNA_high | 0.027                      | -0.122      | 0.177       | 0.974            |
| <b>NTP_low</b>  | NTP_high | 0.061                      | -0.064      | 0.187       | 0.534            |
| <b>RNA_high</b> | NTP_high | 0.055                      | -0.087      | 0.197       | 0.724            |
|                 | NTP_low  | -0.007                     | -0.156      | 0.143       | 1.000            |

**Supplementary Table S4.** HPLC Tukey test results for low dsRNA concentration (0.1 g.L<sup>-1</sup>). Concentration used for DNA correspond to 10 and 90 nM and to NTPs to 2 and 7.6 mM, for low and high, respectively.

| Factor 1        | Factor 2 | Confidence Interval at 95% |             |             | Adjusted P value |
|-----------------|----------|----------------------------|-------------|-------------|------------------|
|                 |          | Mean Difference            | Lower bound | Upper bound |                  |
| <b>DNA_high</b> | DNA_low  | 0.011                      | -0.011      | 0.033       | 0.503            |
|                 | NTP_high | -0.003                     | -0.027      | 0.021       | 0.992            |
|                 | NTP_low  | 0.007                      | -0.017      | 0.031       | 0.874            |
|                 | RNA_low  | 0.009                      | -0.018      | 0.036       | 0.824            |
| <b>DNA_low</b>  | NTP_low  | -0.014                     | -0.038      | 0.010       | 0.352            |
|                 | DNA_low  | -0.004                     | -0.028      | 0.020       | 0.976            |
|                 | RNA_low  | -0.002                     | -0.029      | 0.025       | 0.998            |
| <b>NTP_low</b>  | NTP_high | 0.010                      | -0.015      | 0.036       | 0.710            |
| <b>RNA_low</b>  | NTP_high | 0.012                      | -0.017      | 0.040       | 0.666            |
|                 | NTP_low  | 0.002                      | -0.027      | 0.030       | 0.999            |
